# Supplementary material for: Temoporfin-Conjugated Upconversion Nanoparticles for NIR-Induced Photodynamic Therapy: Studies with Pancreatic Adenocarcinoma Cells In Vitro and In Vivo
Source: MDPI journal article supplement (doi:10.3390/pharmaceutics15122694), 2023-11-28
Supplement: s1 [file s1]

## Supporting Information

### NIR-induced photodynamic therapy of pancreatic tumor using temoporfin-conjugated poly(methyl vinyl ether-*alt*-maleic acid)-coated upconversion nanoparticles in animal model

**Table S1.** Characterization of the nanoparticles with different Er content.

| Particles                          | $D_n$<br>(nm) | $\bar{D}$ |
|------------------------------------|---------------|-----------|
| NaYF <sub>4</sub> :Yb,Er(2 mol.%)  | 25±1          | 1.01      |
| NaYF <sub>4</sub> :Yb,Er(10 mol.%) | 24±1          | 1.01      |
| NaYF <sub>4</sub> :Yb,Er(15 mol.%) | 23±1          | 1.01      |

$D_n$  – number-average particle diameter (TEM);  $\bar{D}$  – dispersity (TEM).

**Table S2.** Concentrations of ions in UCNPs determined by atomic absorption and inductively coupled plasma mass spectroscopy.

|                                  | Concentrations      |      |
|----------------------------------|---------------------|------|
|                                  | (wt.%) <sup>a</sup> | (M)  |
| [Na <sup>3+</sup> ] <sup>1</sup> | 12.1                | 5.28 |
| [Y <sup>3+</sup> ] <sup>2</sup>  | 26.9                | 3.03 |
| [Yb <sup>3+</sup> ] <sup>2</sup> | 13.4                | 0.80 |
| [Er <sup>3+</sup> ] <sup>2</sup> | 18.6                | 1.07 |
| [Fe <sup>2+</sup> ] <sup>1</sup> | 1.0                 | 0.18 |

<sup>a</sup> Percentage represents relative weight content of the specific ions a in the particles according to <sup>1</sup> atomic absorption and <sup>2</sup> inductively coupled plasma mass spectroscopy.

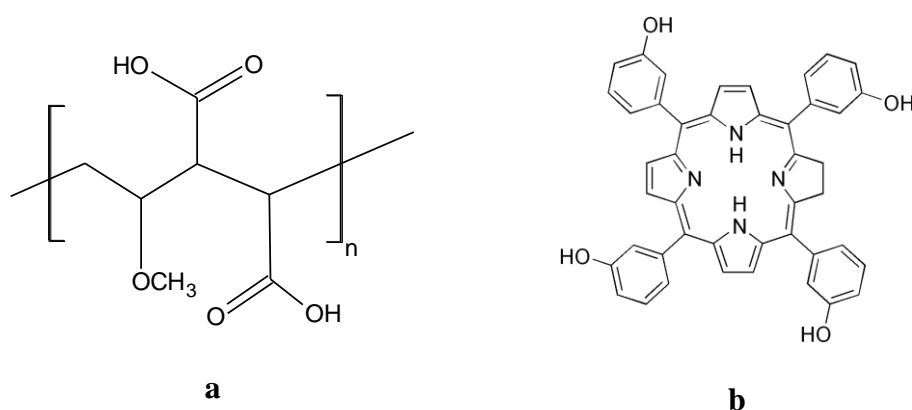

**Figure S1.** Chemical structure of (a) poly(methyl vinyl ether-*alt*-maleic acid) (PMVEMA) and (b) 5,10,15,20-tetra(m-hydroxyphenyl)chlorin (THPC; temoporfin; Foscan®).

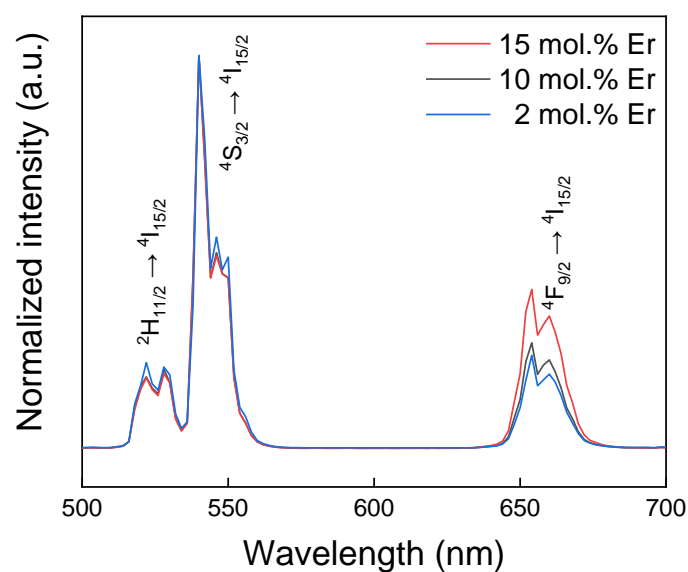

**Figure S2.** Normalized upconversion photoluminescence emission spectra of NaYF<sub>4</sub>:Yb (20 mol.%),Er nanoparticles with different Er content excited at 980 nm with a power density of 2.11 W/cm<sup>2</sup>.

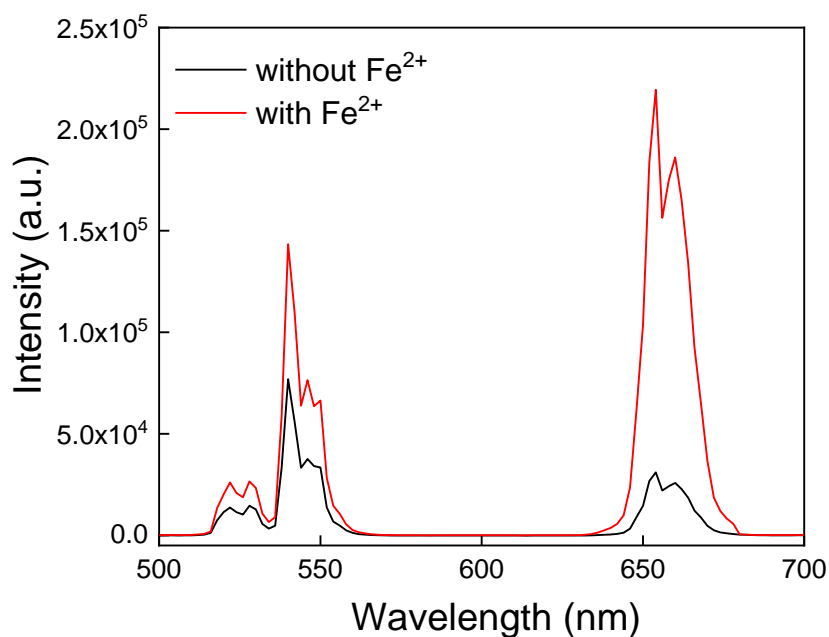

**Figure S3.** Upconversion photoluminescence emission spectra of NaYF<sub>4</sub>:Yb(20 mol%),Er(15 mol%) aqueous dispersions (2 mg/ml) codoped with Fe<sup>2+</sup> excited at 980 nm with a power density of 2.11 W/cm<sup>2</sup>.

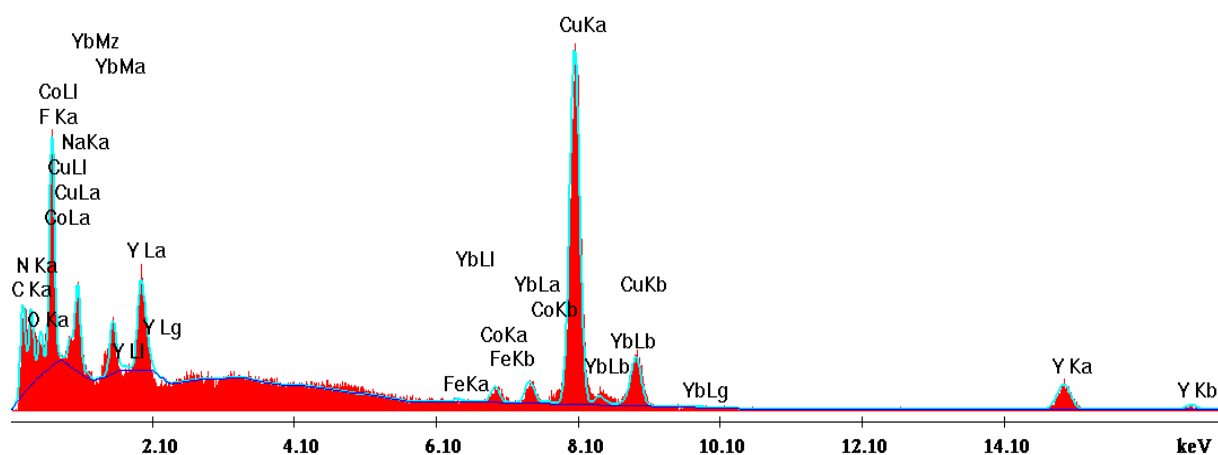

**Figure S4.** TEM/EDX analysis of UCNPs.

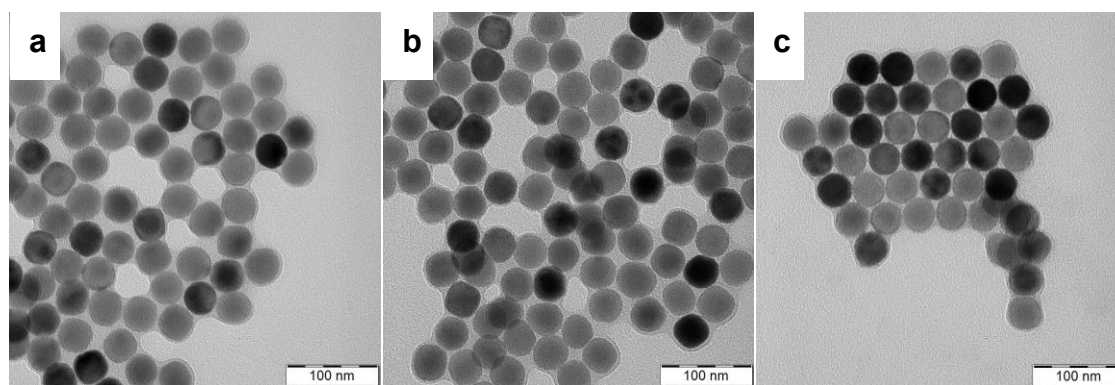

**Figure S5.** TEM micrograph of (a) UCNPs@PVMEMA, (b) UCNPs@PVMEMA-THPC-1 and (c) UCNPs@PVMEMA-THPC-2 particles.

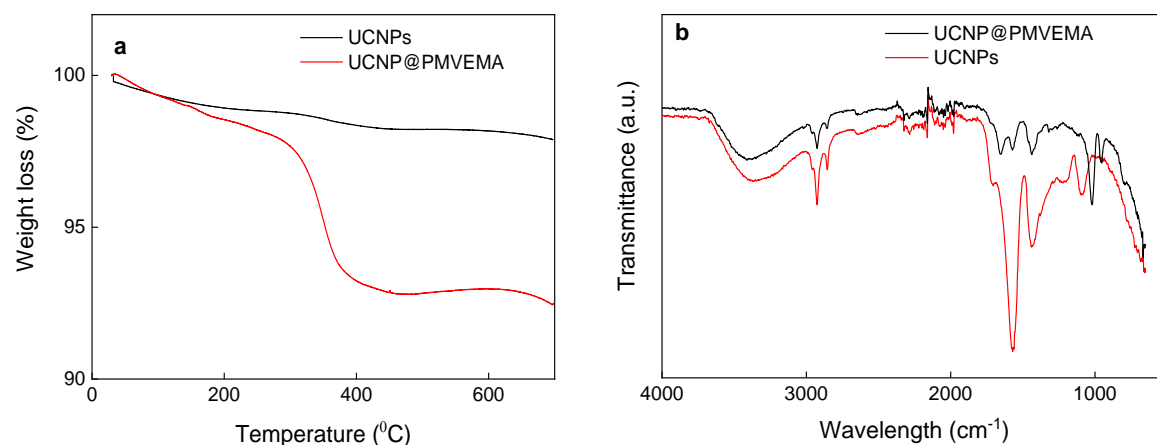

**Figure S6.** (a) TGA thermograms and (b) ATR FTIR spectra of UCNPs and UCNPs@PVMEMA nanoparticles.

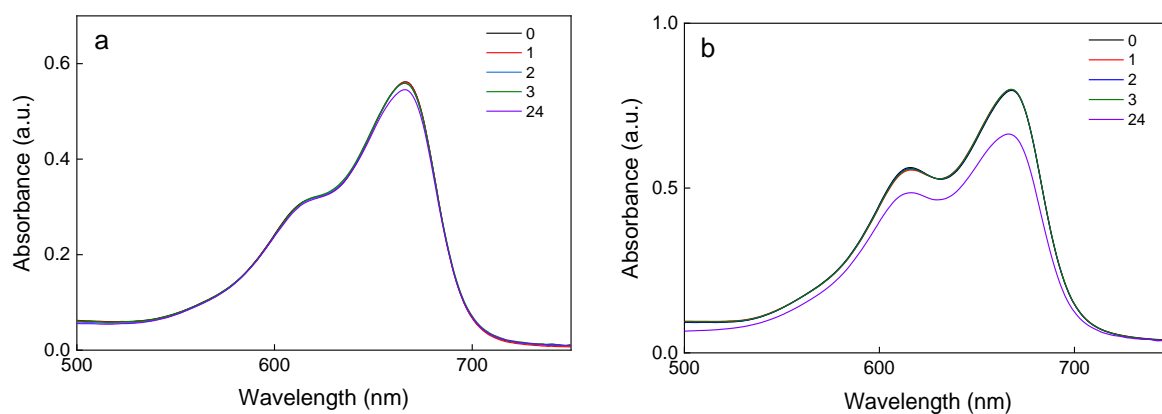

**Figure S7.** UV-Vis spectra of methylene blue degrading in (a) water and (b) PBS in the presence of UCNP@PVMEMA particles and  $H_2O_2$ .

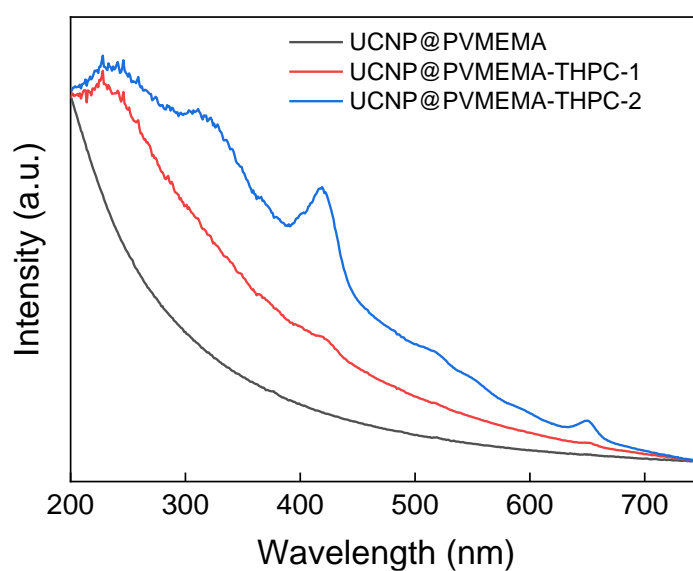

**Figure S8.** UV-Vis absorption spectra of UCNP@PVMEMA, UCNP@PVMEMA-THPC-1 and UCNP@PVMEMA-THPC-2.

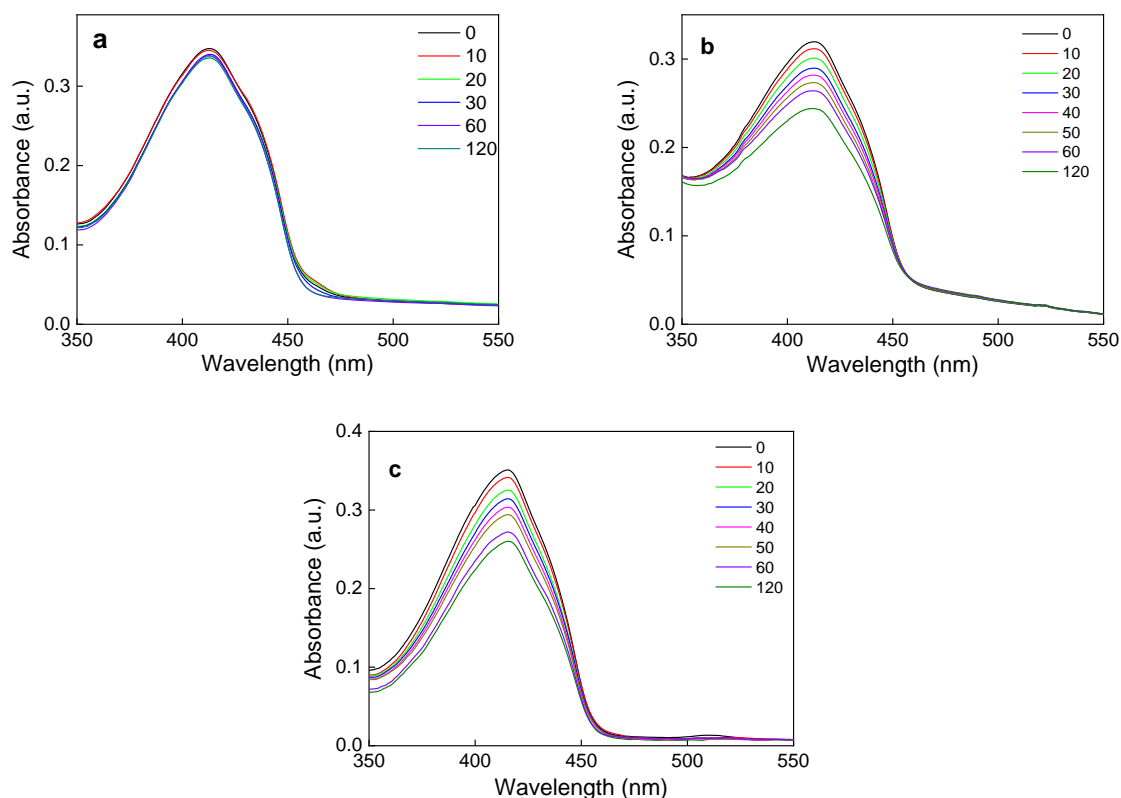

**Figure S9.** UV-Vis spectra of DPBF in ethanol/H<sub>2</sub>O (50/50; v/v) containing (a) UCNP@PVMEMA, (b) UCNP@PVMEMA-THPC-1 and (c) UCNP@PVMEMA-THPC-2 particles versus irradiation time (min) at 980 nm excitation with a power density of 2.11 W/cm<sup>2</sup>. The time-dependent decrease in the absorbance of DPBF is evidence of <sup>1</sup>O<sub>2</sub> generation.

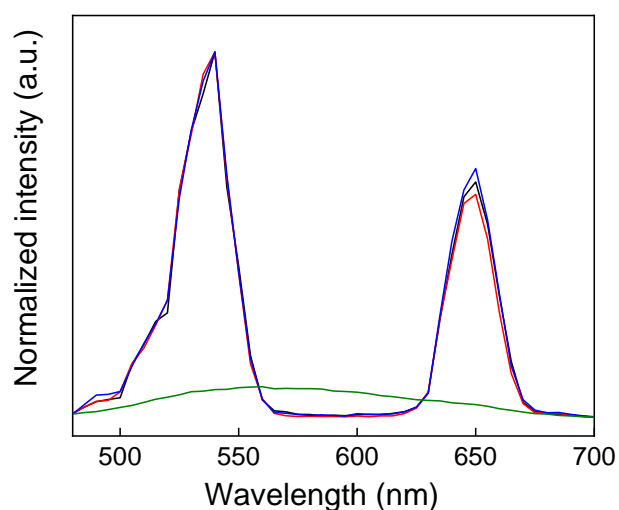

**Figure S10.** Normalized upconversion photoluminescence emission spectra of UCNP@PVMEMA (black), UCNP@PVMEMA-THPC-1 (red) and UCNP@PVMEMA-THPC-2 (blue) localized in the INS-1E cells and cell autofluorescence without particles (green) excited at 980 nm.
